# Supplementary material
Source: PubMed Central journal article supplement (PMC3317553)
Supplement: cr2011161x3.pdf [file cr2011161x3.pdf]

## Supplementary information, Figure S3

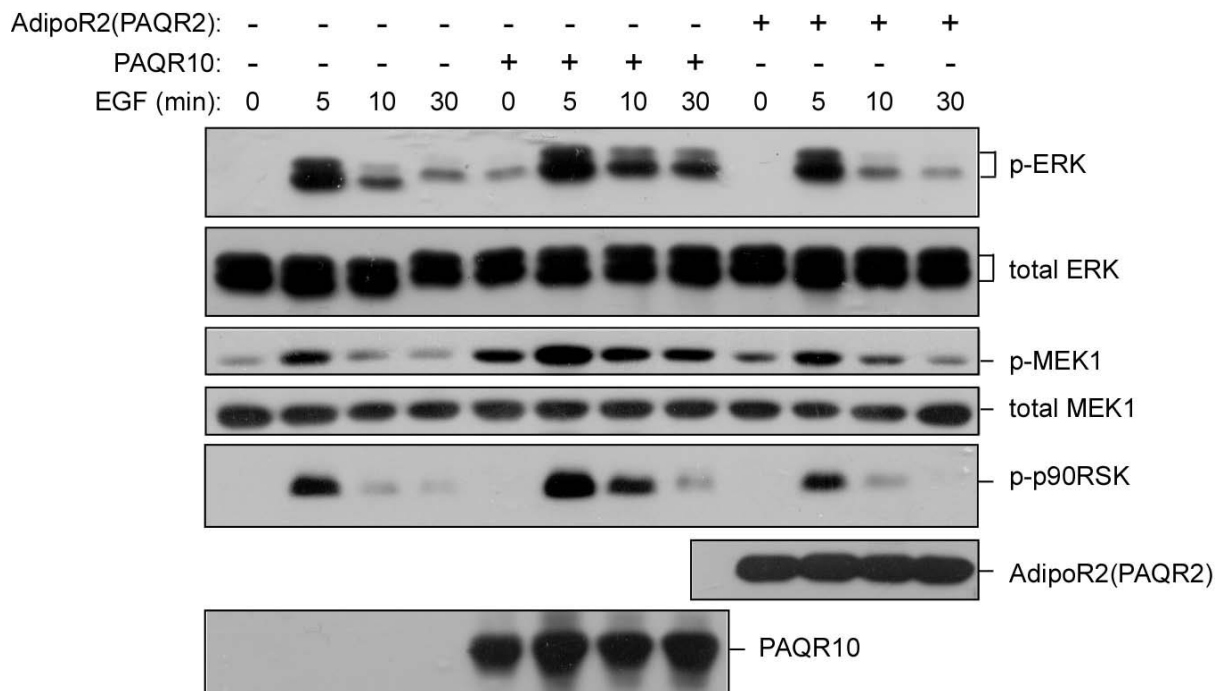

**Figure S3** PAQR10 but not AdipoR2 can activate ERK signaling. HEK293T cells were transiently transfected with Flag-tagged PAQR10 and Flag-tagged AdipoR2, respectively. Twenty-four hours after transfection, the cells were serum-starved for 6 h before treatment with EGF (100 ng/ml) for various lengths of time. Total cell lysate was used in the detection of phosphorylated ERK, total ERK, phosphorylated MEK1, total MEK1, phosphorylated p90RSK, and Flag-tagged proteins by Western blotting.
