# Supplementary material
Source: PubMed Central journal article supplement (PMC3317553)
Supplement: cr2011161x4.pdf [file cr2011161x4.pdf]

Supplementary information, Figure S4

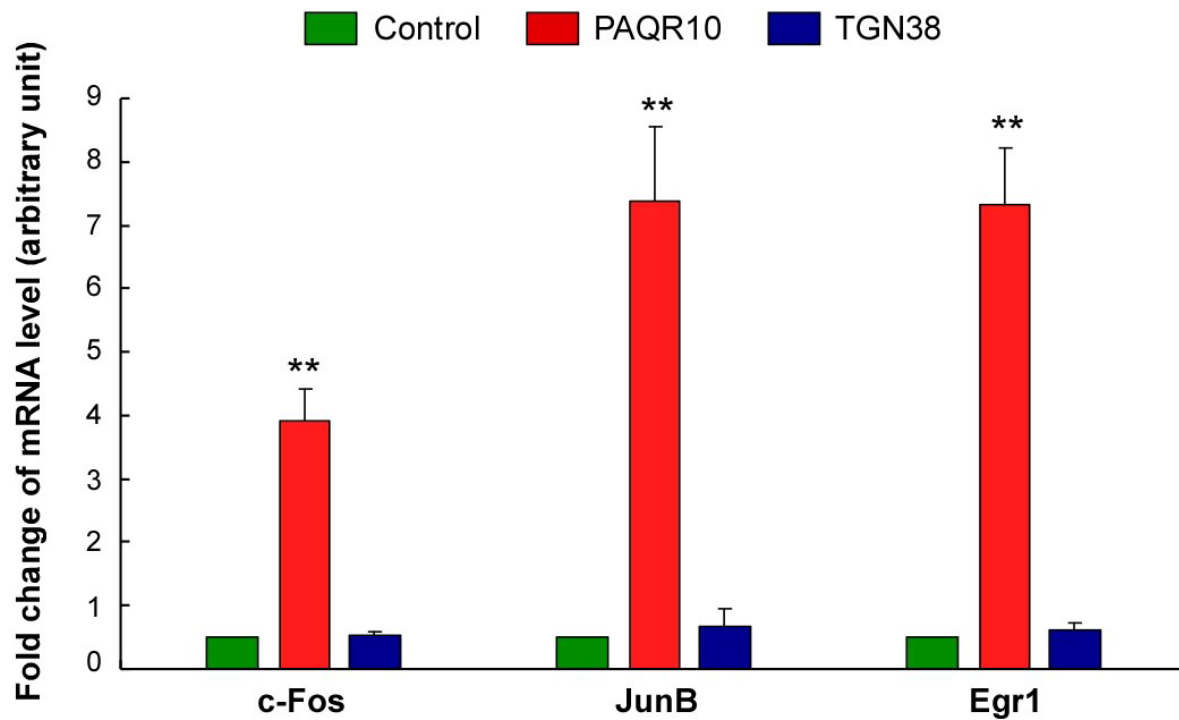

**Figure S4** A Golgi-specific protein TGN38 does not affect ERK signaling. HEK293T cells were transiently transfected with the plasmids as indicated. Twenty-four hours after transfection, the cells were collected and real-time RT-PCR was used to determine the expression of c-Fos, JunB and Egr-1. Fold change of the genes compared with actin was shown as mean  $\pm$  SD. \*\*P < 0.01 as comparison with the control group.
