# Supplementary material
Source: PubMed Central journal article supplement (PMC3317553)
Supplement: cr2011161x5.pdf [file cr2011161x5.pdf]

Supplementary information, Figure S5

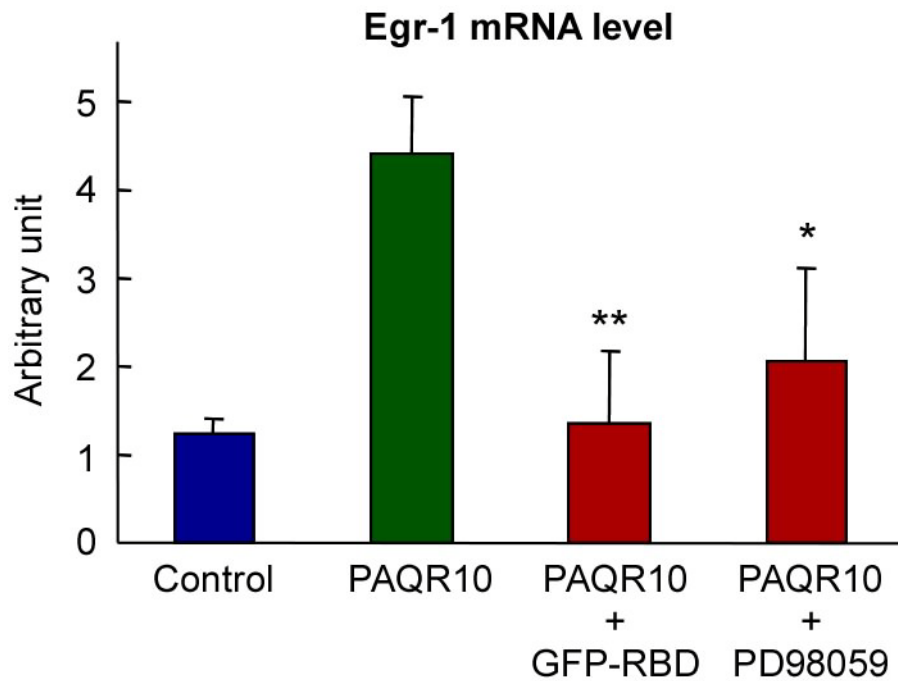

**Figure S5** PAQR10-mediated stimulation of Egr-1 gene expression is inhibited by GFP-RBD and MEK inhibitor PD98059. HEK293T cells were transiently transfected with the plasmids or pretreated with PD98059 as indicated. Twenty-four hours after transfection, the cells were collected and real-time RT-PCR was used to determine the expression of Egr-1 and actin. Fold change of Egr-1 gene compared with actin was shown as mean  $\pm$  SD for three independent experiments. \*P < 0.05 and \*\*P < 0.01 as comparison with the PAQR10-transfected group.
