# Supplementary material
Source: PubMed Central journal article supplement (PMC3317553)
Supplement: cr2011161x6.pdf [file cr2011161x6.pdf]

## Supplementary information, Figure S6

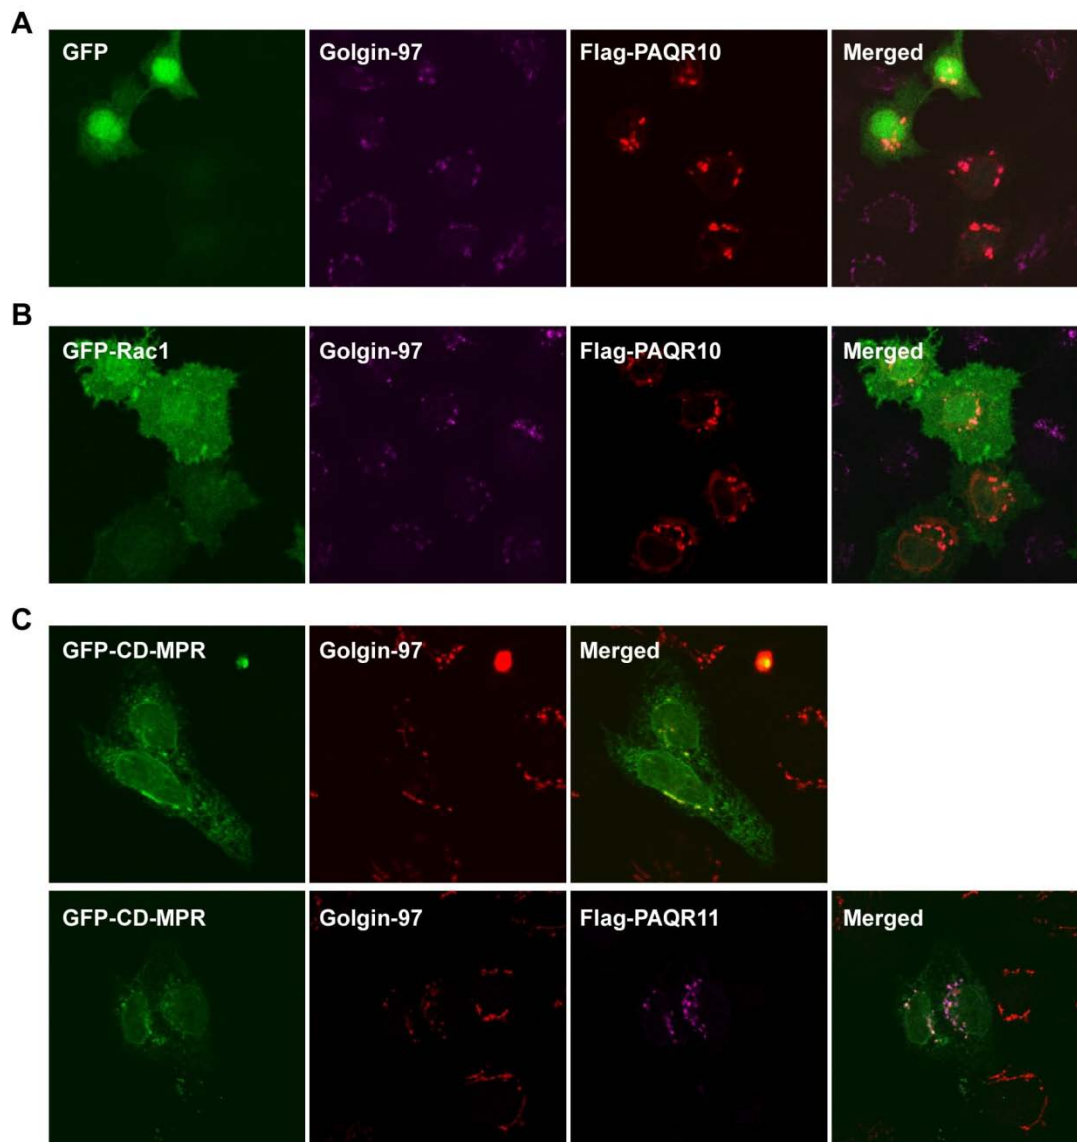

**Figure S6** Control experiments for confocal studies. **(A)** PAQR10 does not colocalize with GFP. HeLa cells were transfected with GFP and Flag-tagged PAQR10, following by immunostaining and confocal analysis. **(B)** PAQR10 does not colocalize with Rac1. HeLa cells were transfected with GFP-fused Rac1 and Flag-tagged PAQR10, following by immunostaining and confocal analysis. **(C)** PAQR11 cannot increase the localization of CD-MPR in the Golgi apparatus. HeLa cells were transfected with GFP-fused CD-MPR with or without Flag-tagged PAQR11, following by immunostaining and confocal analysis.
