# Supplementary material
Source: PubMed Central journal article supplement (PMC3317553)
Supplement: cr2011161x7.pdf [file cr2011161x7.pdf]

# Supplementary information, Figure S7

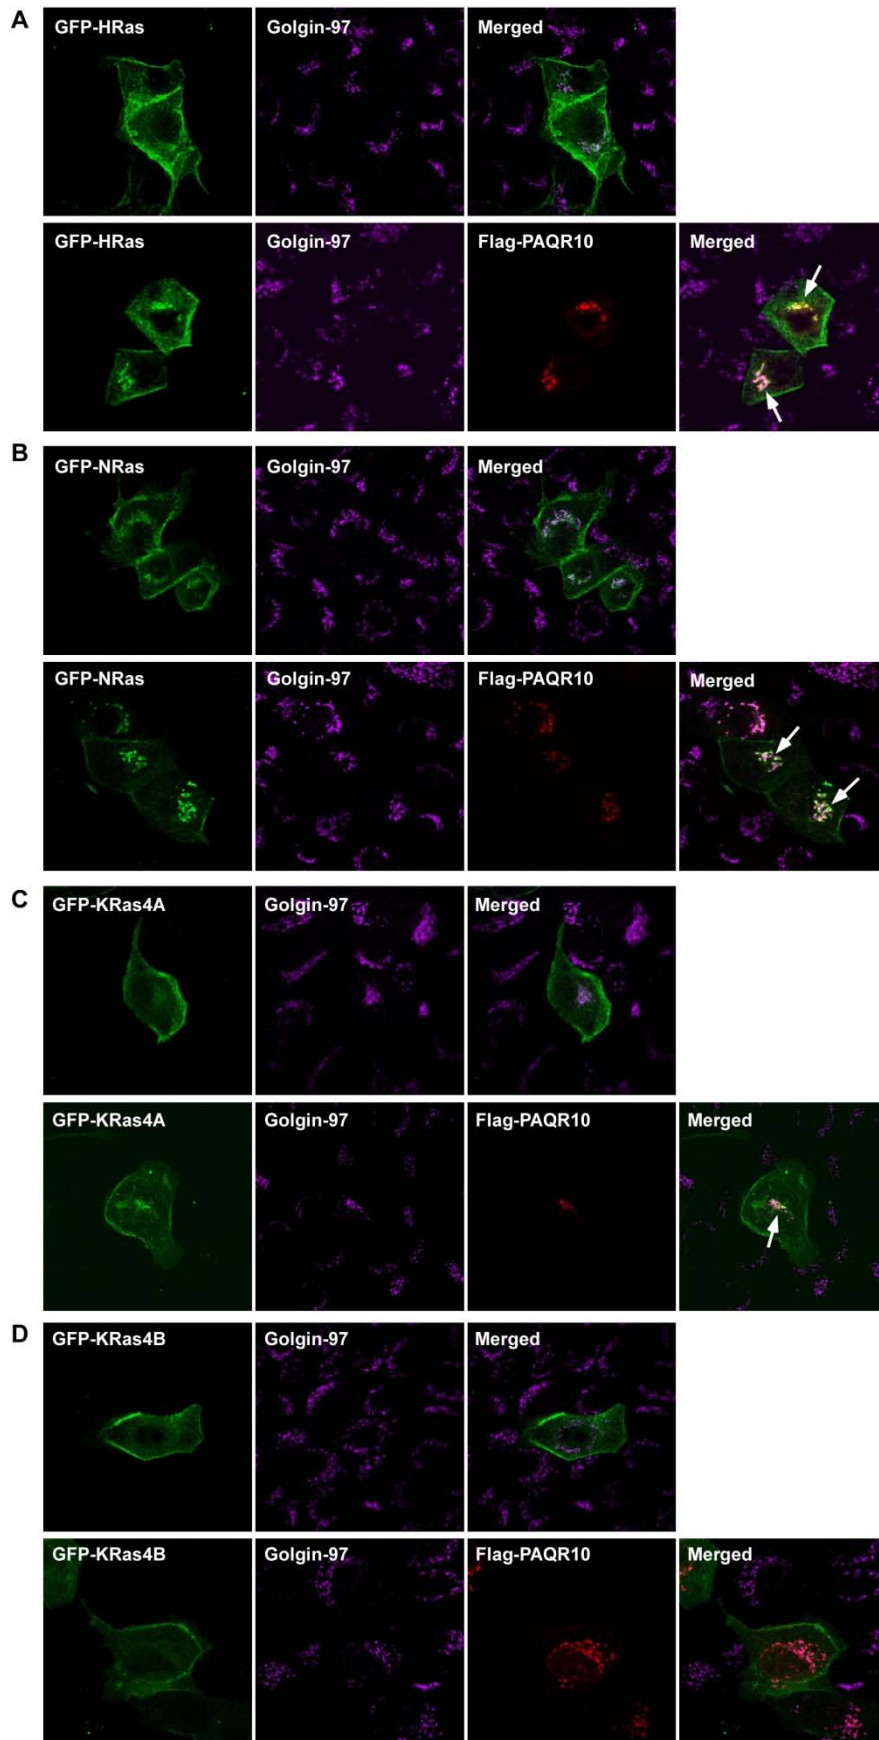

**Figure S7** PAQR10 increases Golgi localization of HRas, NRas, KRas4A but no KRas4B in the Golgi apparatus in MDCK cells. **(A)** PAQR10 colocalizes with HRas in the Golgi apparatus in MDCK cells. MDCK cells were transfected with GFP-fused HRas with or without Flag-tagged PAQR10, followed by immunostaining and confocal analysis. The arrow indicates colocalization in the Golgi apparatus. **(B)** PAQR10 colocalizes with NRas in the Golgi apparatus in MDCK cells. The arrow indicates colocalization in the Golgi apparatus. **(C)** PAQR10 colocalizes with KRas4A in the Golgi apparatus in MDCK cells. The arrow indicates colocalization of KRas4A with PAQR10 in the Golgi apparatus. **(D)** PAQR10 does not colocalize with KRas4B in the Golgi apparatus in MDCK cells.
