# Supplementary material
Source: PubMed Central journal article supplement (PMC3317553)
Supplement: cr2011161x8.pdf [file cr2011161x8.pdf]

## Supplementary information, Figure S8

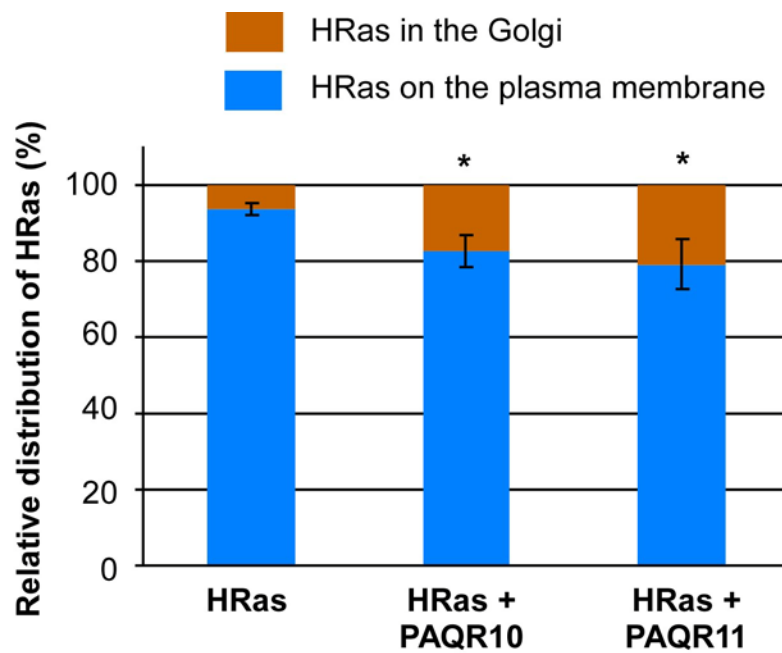

**Figure S8** The distribution of HRas on the plasma membrane and Golgi apparatus is affected by PAQR10/PAQR11 overexpression. The relative signal intensity of HRas on plasma membrane (PM) or in the Golgi apparatus based on the data for Figure 2A was quantified and shown as mean  $\pm$  SD. \* $P < 0.05$  as compared to the HRas alone group for both Golgi and plasma membrane distribution.
