# Supplementary material
Source: PubMed Central journal article supplement (PMC3317553)
Supplement: cr2011161x9.pdf [file cr2011161x9.pdf]

Supplementary information, Figure S9

**A**

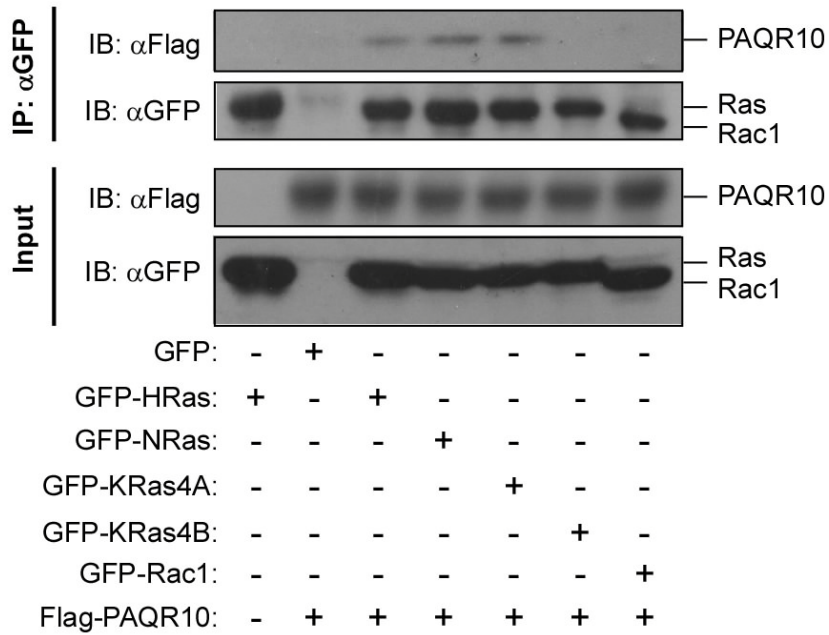

**B**

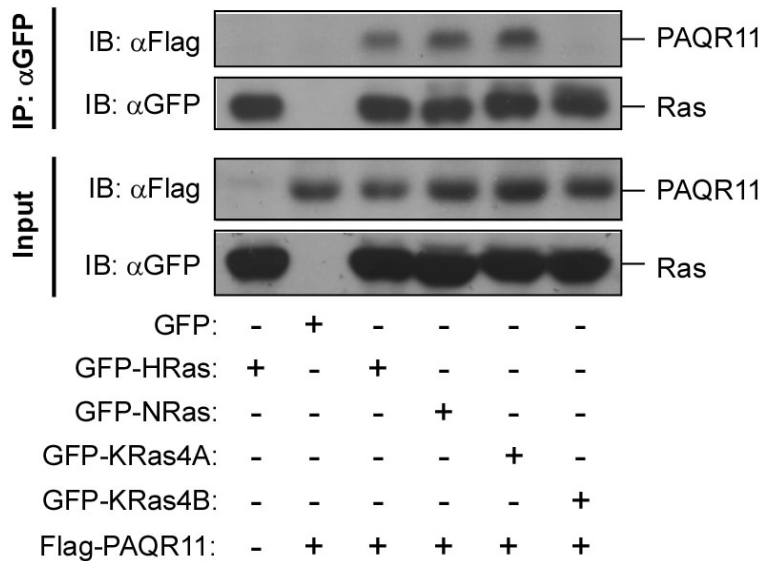

**Figure S9** Interaction of PAQR10/PAQR11 with HRas, NRas and KRas4A. HEK293T cells were transiently transfected with GFP-fused HRas, NRas, KRas4A, KRas4B and Rac1 with Flag-tagged PAQR10 (left panel) or Flag-tagged PAQR11 (right panel) as indicated. Twenty-four hours after transfection, cell lysate was used in immunoprecipitation (IP) and immunoblotting (IB) with the antibodies as indicated.
