# Supplementary material
Source: PubMed Central journal article supplement (PMC3317553)
Supplement: cr2011161x10.pdf [file cr2011161x10.pdf]

Supplementary information, Figure S10

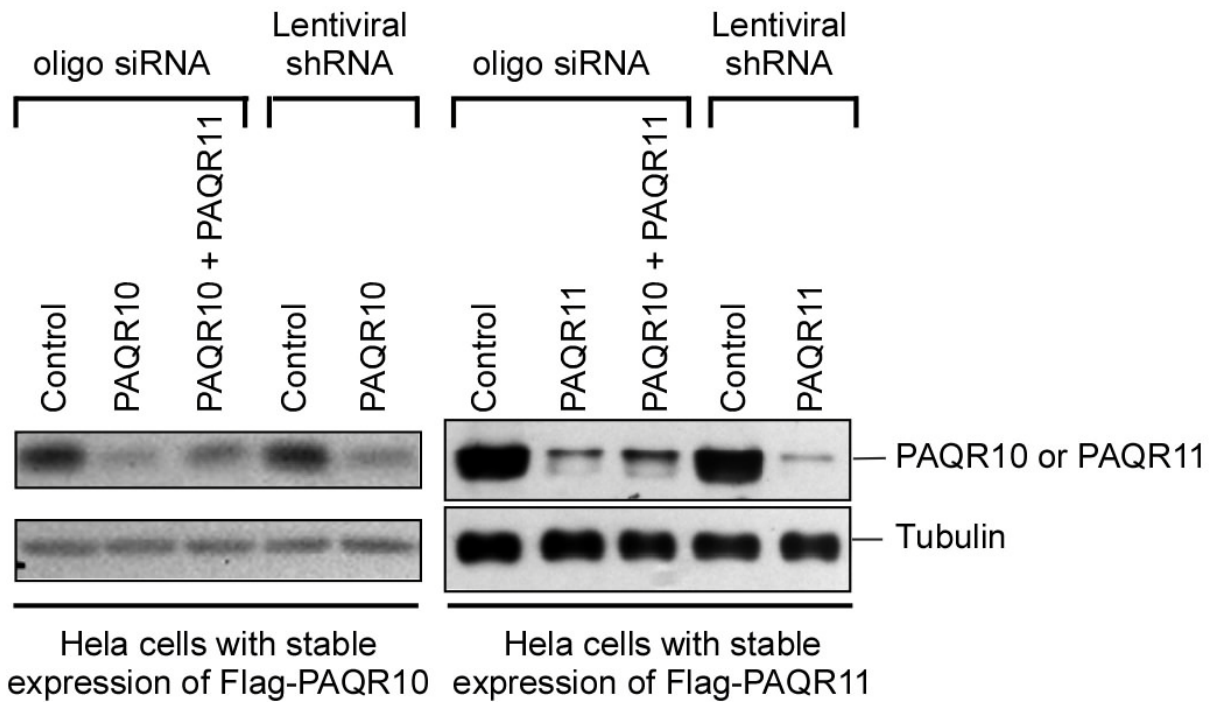

**Figure S10** Analysis of PAQR10/PAQR11 siRNA efficiency. HeLa cells stably transfected with Flag-tagged PAQR10 and Flag-tagged PAQR11 were transfected with synthesized siRNA or infected with lentivirus as indicated. Forty-eight hours after transfection, the cell lysate was used to detect the expression levels of Flag-PAQR10 and Flag-PAQR11 by Western blotting.
