# Supplementary material
Source: PubMed Central journal article supplement (PMC3317553)
Supplement: cr2011161x11.pdf [file cr2011161x11.pdf]

Supplementary information, Figure S11

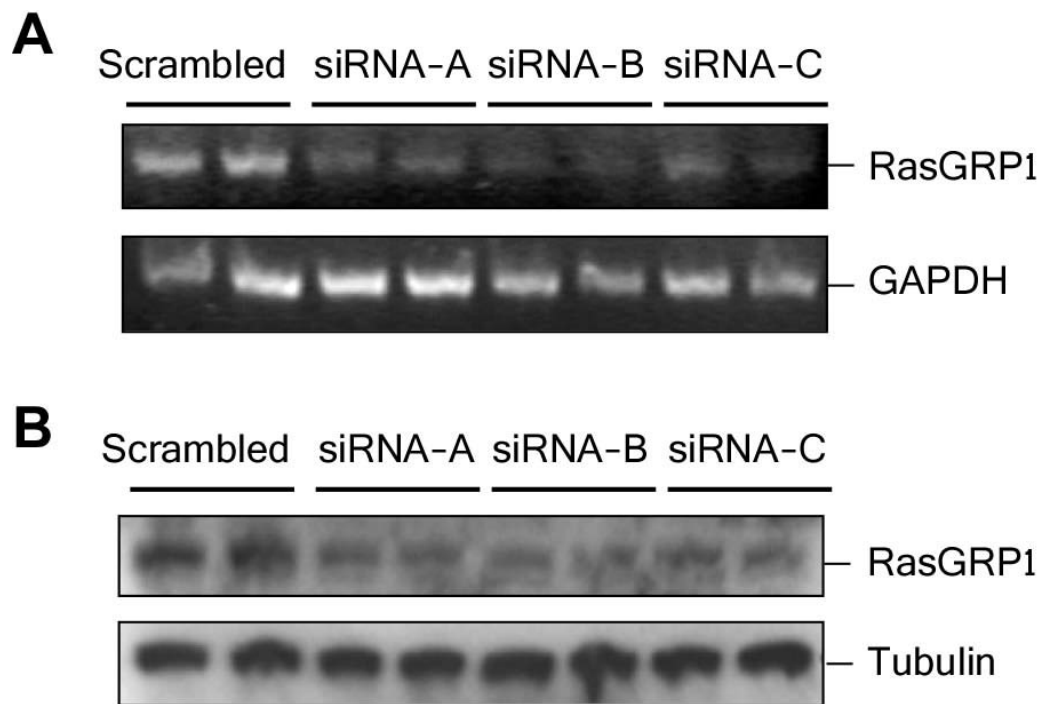

**Figure S11** Analysis of RasGRP1 siRNA efficiency. **(A)** Analysis of siRNA efficiency to silence RasGRP1 by RT-PCR. HEK293T cells were transfected with synthesized siRNA as indicated. Seventy-two hours after transfection, mRNA was used to detect the interference efficiency by RT-PCR. **(B)** Analysis of siRNA efficiency to silence RasGRP1 by Western blotting. HEK293T cells were transfected with synthesized siRNA as indicated. Seventy-two hours after transfection, cell lysate was used to detect the interference efficiency by immunoblotting with antibodies for RasGRP1 and tubulin.
