# Supplementary material
Source: PubMed Central journal article supplement (PMC3317553)
Supplement: cr2011161x12.pdf [file cr2011161x12.pdf]

## Supplementary information, Figure S12

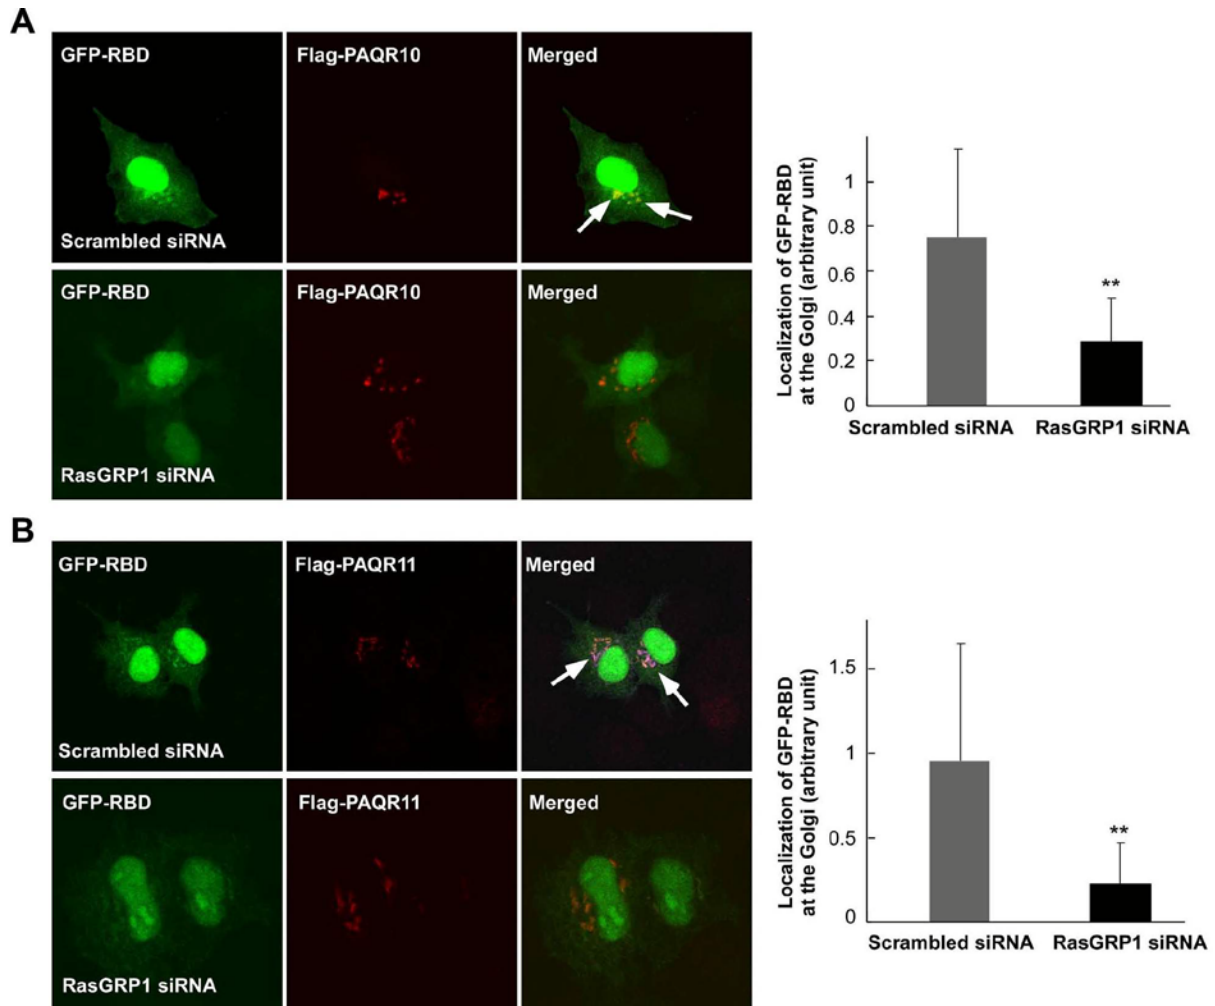

**Figure S12** Silencing of RasGRP1 affects activation of Ras in the Golgi apparatus by PAQR10/PAQR11 overexpression. HeLa cells were cotransfected with synthesized siRNA, GFP-RBD, and Flag-tagged PAQR10 (**A**) or Flag-tagged PAQR11 (**B**) as indicated. Forty eight hours after transfection, the cells were serum-starved overnight before immunostaining and confocal analysis. The arrow indicates colocalization of PAQR10 or PAQR11 with GFP-RBD. The relative signal intensity of Golgi accumulation of GFP-RBD was quantified and shown in the right panels. \*\* $P < 0.01$  and \*\* $P < 0.01$  between the two groups.
