# Supplementary material
Source: PubMed Central journal article supplement (PMC3317553)
Supplement: cr2011161x13.pdf [file cr2011161x13.pdf]

# Supplementary information, Figure S13

**A**

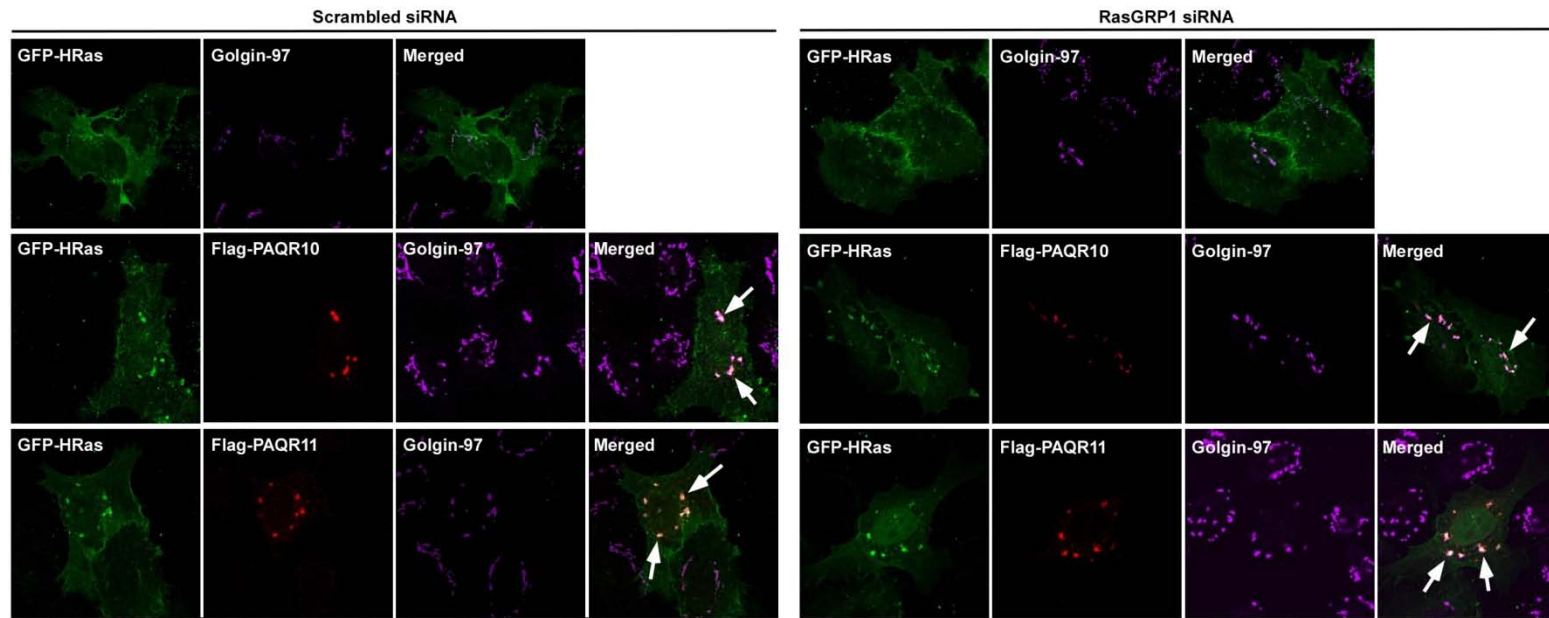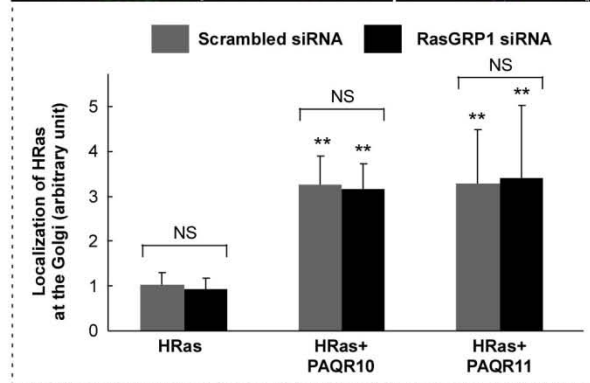

**B**

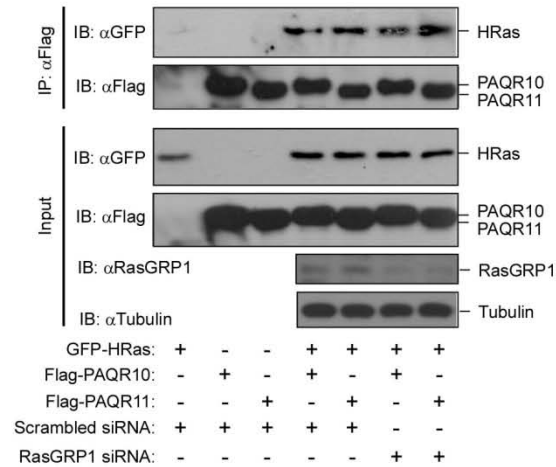

**Figure S13** Knockdown of RasGRP1 does not affect PAQR10/PAQR11-induced Golgi localization of HRas and the interaction between HRas and PAQR10/PAQR11. **(A)** Knockdown of RasGRP1 does not affect tethering of HRas to the Golgi apparatus by PAQR10 and PAQR11. HeLa cells were transfected with the plasmids and siRNA as indicated and used in immunostaining and confocal analysis. The arrows indicate the colocalization of HRas with PAQR10 or PAQR11 in the Golgi. The relative signal intensity of HRas in the Golgi apparatus was quantified and shown in the lower panel (mean  $\pm$  SD).  $^{***}P < 0.01$  as compared with the group transfected with HRas alone. **(B)** Knockdown of RasGRP1 does not affect the interaction of HRas with PAQR10/PAQR11. HEK293T cells were transiently transfected with the plasmids and siRNA as indicated. Seventy-two hours after transfection, the cell lysate was collected and used in immunoprecipitation (IP) and immunoblotting (IB) using the antibodies as indicated.
