# Supplementary material
Source: PubMed Central journal article supplement (PMC3317553)
Supplement: cr2011161x14.pdf [file cr2011161x14.pdf]

Supplementary information, Figure S14

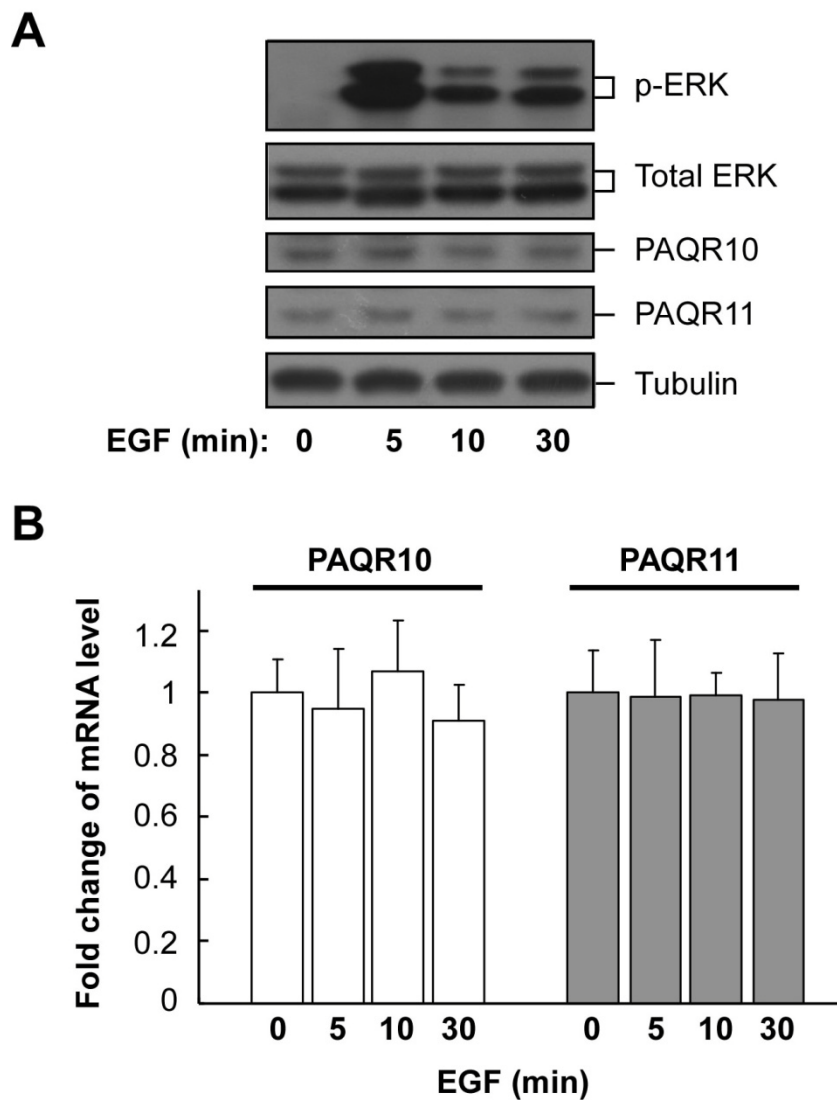

**Figure S14** EGF treatment has no effect on the expression of PAQR10 and PAQR11. HEK293T cells were treated with EGF (100 ng/ml) for different length of time. The cell lysate was used in immunoblotting using antibodies as indicated (**A**) or in real-time RT-PCR to analyze the mRNA levels PAQR10/PAQR11 (**B**, shown as mean  $\pm$  SD).
