# Supplementary material
Source: PubMed Central journal article supplement (PMC3317553)

Supplementary information, Figure S1

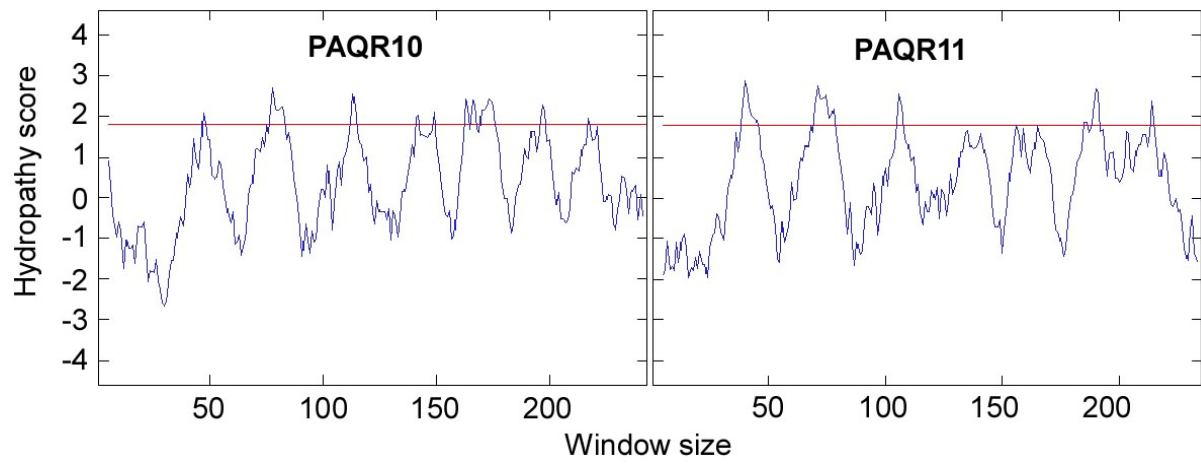

**Figure S1** Hydrophobicity analysis of PAQR10 and PAQR11.

Supplement: cr2011161x1.pdf [file cr2011161x1.pdf]
